# Supplementary material
Source: HighWire-hosted journal article supplement (https://jnm.snmjournals.org/highwire/filestream/94356/field_highwire_adjunct_files/0/111948_Supplemental_Data.pdf)
Supplement: 111948_Supplemental_Data.pdf [file 111948_Supplemental_Data.pdf]

Supplemental Figure 5.

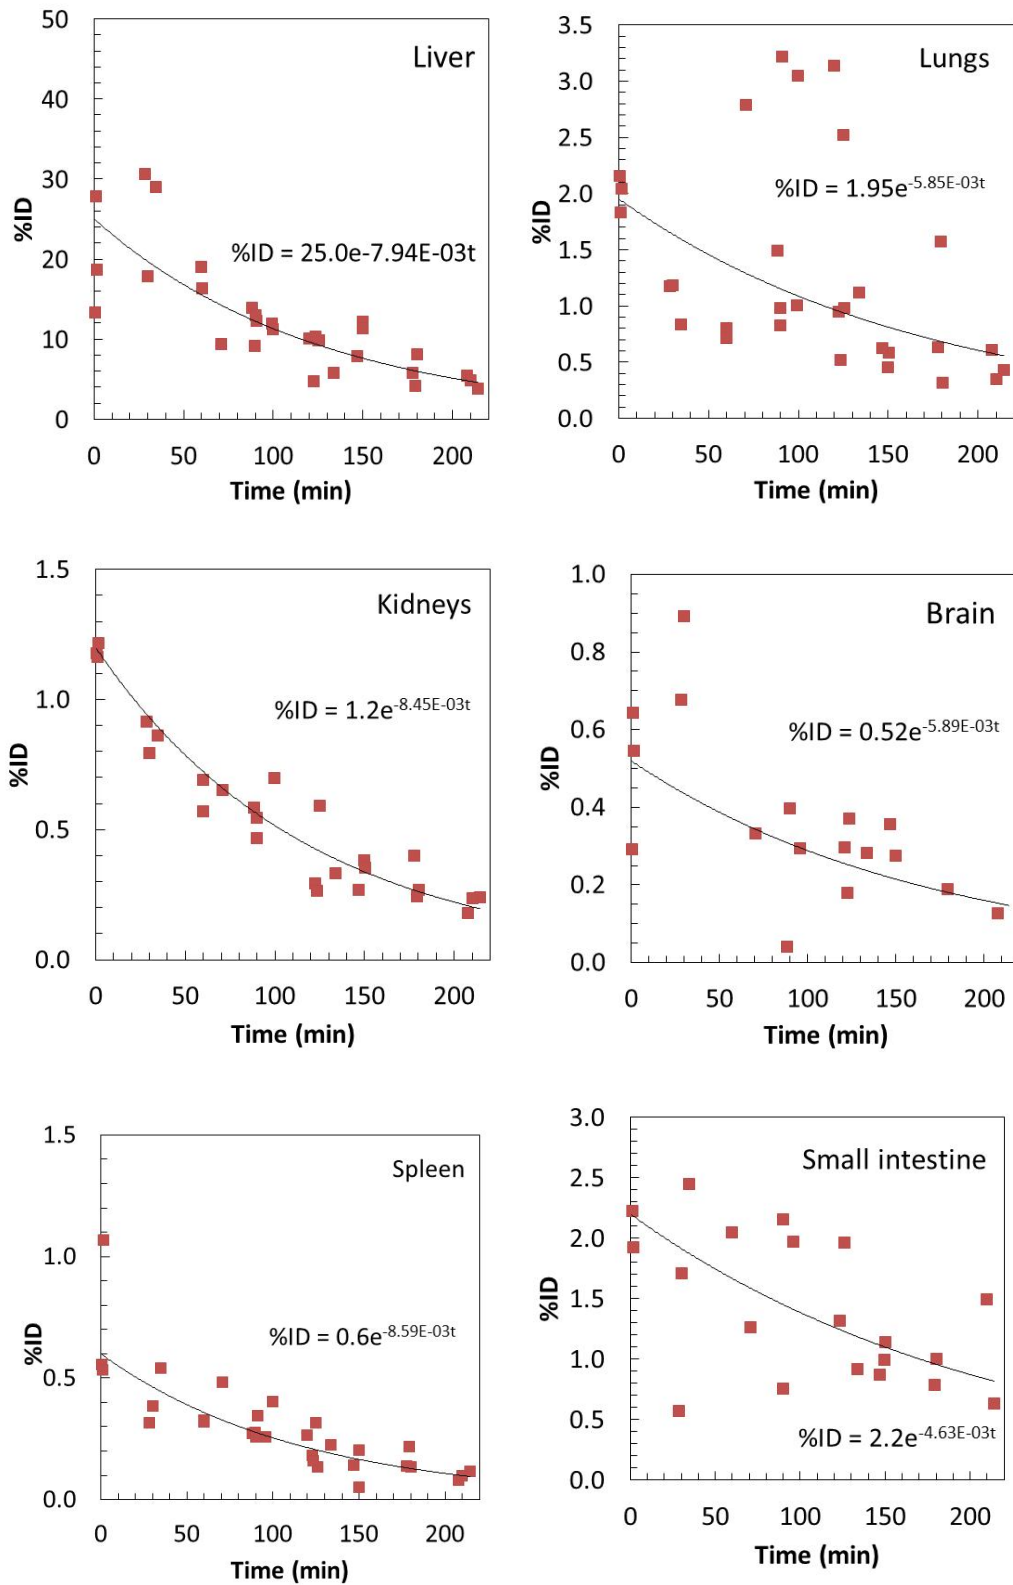

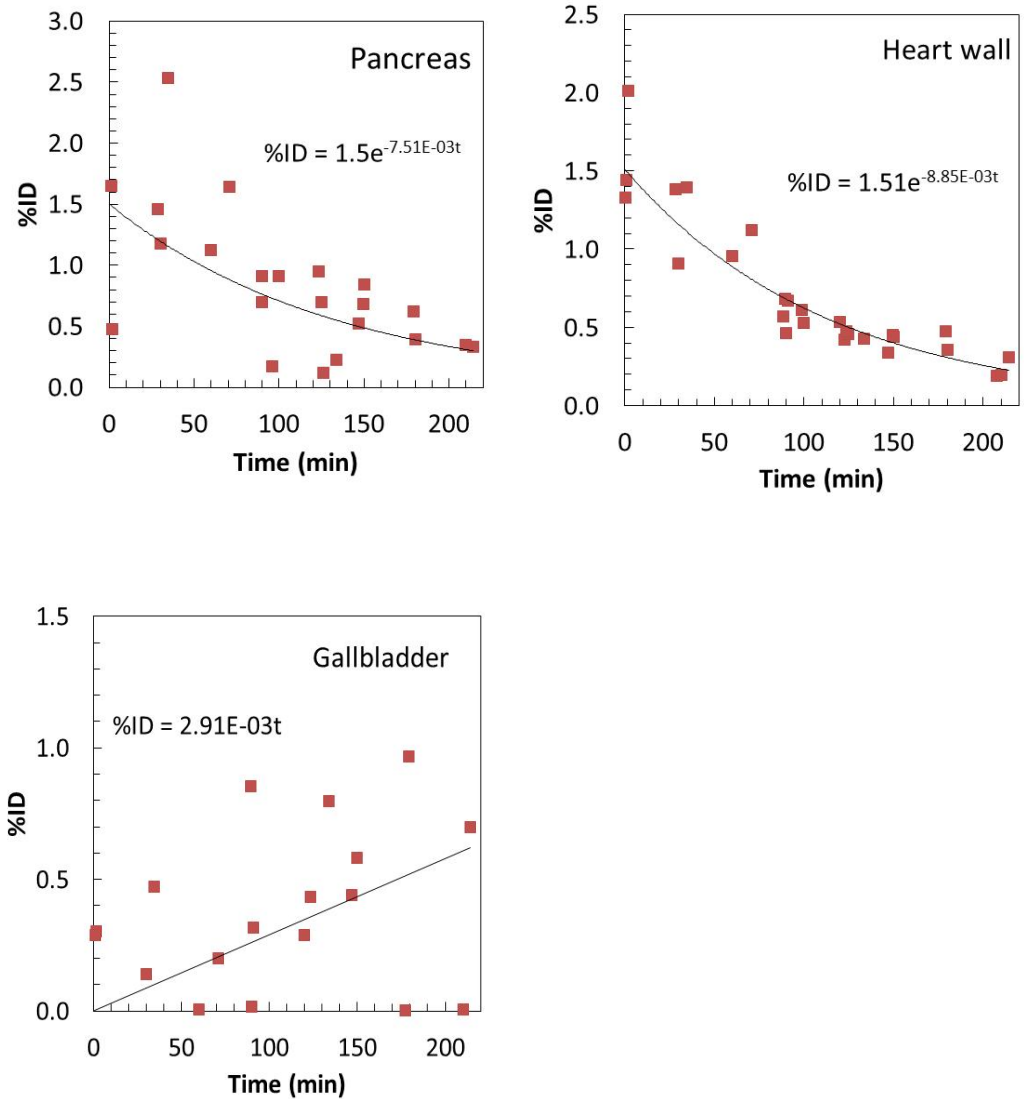

**Figure 5.** Measured organ time activity curves derived from the compilation of the normalized activity in the visible organ on the PET/CT images
